# Supplementary material
Source: publisher figshare collection journal article supplement (https://frontiersin.figshare.com/ndownloader/files/30819430)
Supplement: Supplementary file [file 30819430]

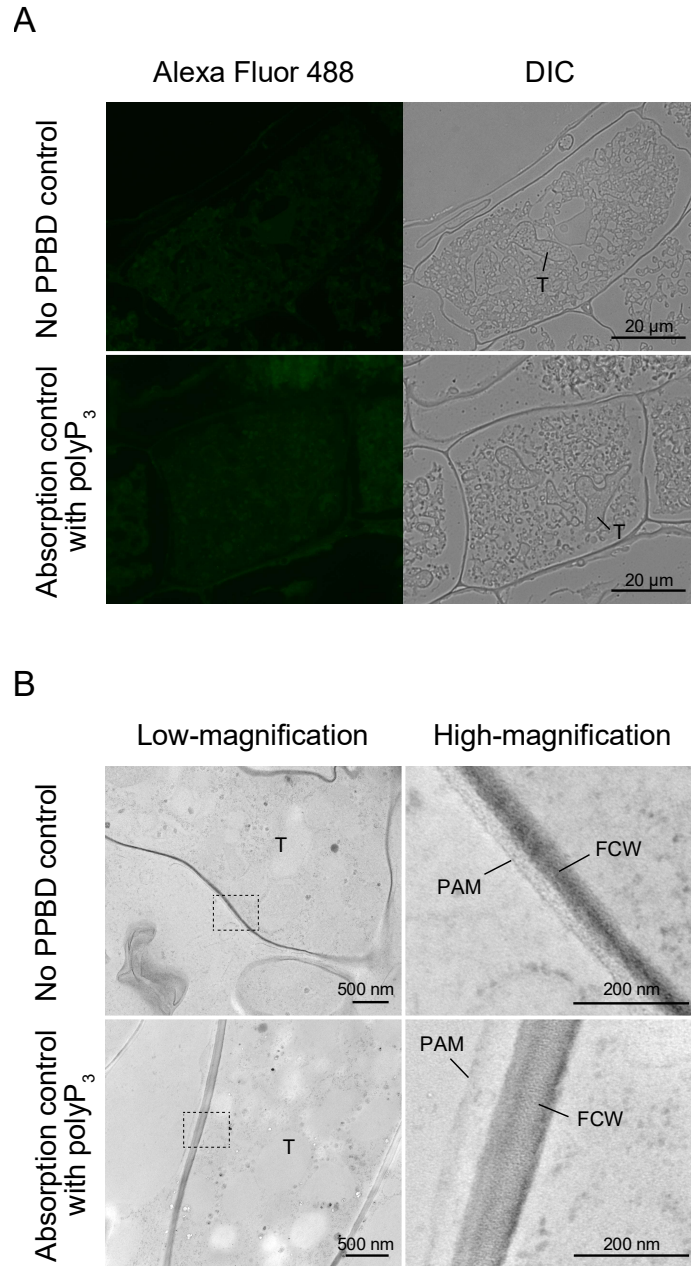

**Supplementary Figure 1** | Negative controls for polyphosphate (polyP) labeling using the polyP binding domain (PPBD) affinity method. Sections of wild-type (WT) *Lotus japonicus* roots colonized by *Rhizophagus irregularis* were incubated without PPBD (no PPBD control) or with an excess of tripolyphosphate (absorption control with polyP<sub>3</sub>) during the PPBD-anti-Xpress antibody incubation. **(A)** Fluorescence microscopy images of Alexa Fluor 488, a secondary antibody conjugate, and differential interference contrast (DIC) images of arbuscules. **(B)** Micrographs of transmission electron microscopy. The right panels show magnified images of the dotted areas in the left panels. FCW: fungal cell wall, PAM: periarbuscular membrane, T: trunk hypha.

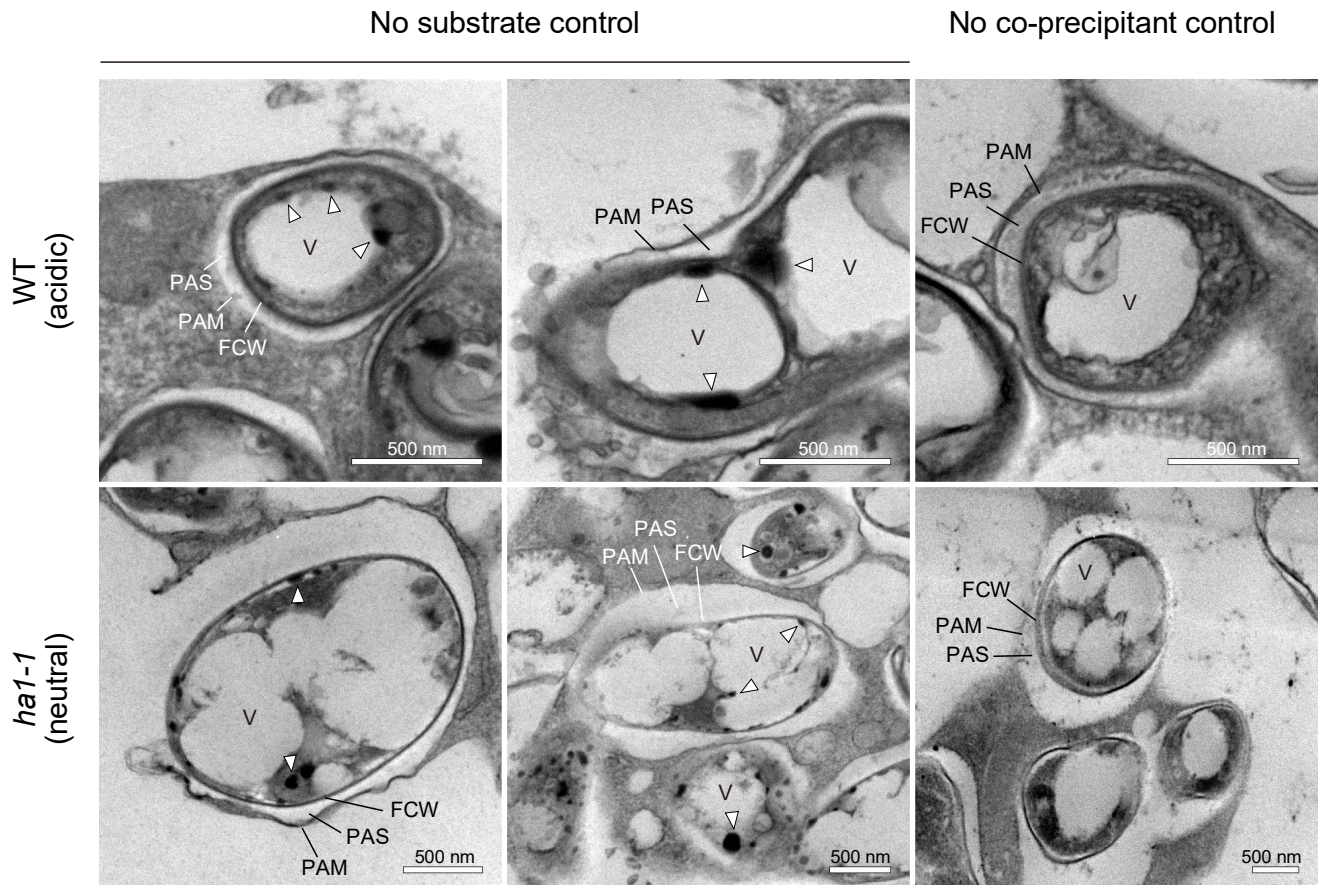

**Supplementary Figure 2** | Negative controls for enzyme cytochemistry of phosphatase activity. Transmission electron micrographs show acid and neutral phosphatase activity in arbuscule-containing cortical cells of wild-type (WT) and *ha1-1*, respectively. Mycorrhizal roots were incubated in the absence of  $\beta$ -glycerophosphate (no substrate control) or cerium salt (no co-precipitant control) in the reaction buffer. In the no substrate control, a few precipitates (white triangles) were observed in fungal vacuoles. FCW: fungal cell wall, PAM: periarbuscular membrane, PAS: periarbuscular space, V: vacuole.

**Supplementary Table 1 | Primers used in this study.**

| Gene name                                   | Primer sequence (5'→3')     | Reference                    |
|---------------------------------------------|-----------------------------|------------------------------|
| Screening of <i>LORE1</i> insertion mutants |                             |                              |
| <i>HA1</i> (plant ID: 30006854)             | TTTCATTGTGGAAGCTGGACATTTTGA | This study                   |
|                                             | TGGTTCACATAGGCTGTCTCAGCA    |                              |
| P2 primer                                   | ACCTTGTTGCTTCAGCCATGG       | Urbanski <i>et al.</i> 2012. |
| RT-PCR                                      |                             |                              |
| <i>HA1</i>                                  | AAGCGCGGAGATTATCAAGA        | This study                   |
|                                             | TTTACCACCAGATCCCAAGC        |                              |
| <i>EF2</i>                                  | AGTTGCTTTGGTTGGTTTGG        | This study                   |
|                                             | AAGTGGGGTACCTTGCCTCT        |                              |
| qRT-PCR                                     |                             |                              |
| <i>Lotus japonicus</i>                      |                             |                              |
| <i>EF2</i>                                  | GGTGGCTGCTGCTGGAATTA        | This study                   |
|                                             | ACGGGTATCAGTCATACGGACAT     |                              |
| <i>PT1</i>                                  | TGCCGGCCGAGATTTTC           | This study                   |
|                                             | GCAGCTGAGATTCCATGACAAG      |                              |
| <i>PT2</i>                                  | GGGCCTAATGCCACCACAT         | This study                   |
|                                             | CGGAATCTAGCCGGGAAAA         |                              |
| <i>PT3</i>                                  | CCTCACGCGGAGGAAATG          | This study                   |
|                                             | GTTGATGCTCTTGCAACCTTGTA     |                              |
| <i>PT4</i>                                  | TCCGGGCTCTCCTTTGG           | Kojima <i>et al.</i> 2014.   |
|                                             | AGAAGCATAGCGTTCCCATCA       |                              |
| <i>AMT2;2</i>                               | ACACATGCTTGCACTGCTACC       | Guether <i>et al.</i> 2009.  |
|                                             | CTGCCCATCCTTGAACAACCC       |                              |
| <i>RAM2</i>                                 | GCCCGTAGCCATGGTGAA          | This study                   |
|                                             | CCCTCTTGCACTGGTTCCA         |                              |
| <i>Rhizophagus irregularis</i>              |                             |                              |
| <i>EF1β</i>                                 | CCCATGCAGCTCGATGGTA         | Kobae <i>et al.</i> 2015.    |
|                                             | TGCCAGGAAGTGAAGAAAATGA      |                              |
| <i>VTC1</i>                                 | GAGAATCAGGTCCTTATGATGATAGGT | This study                   |
|                                             | CACCCACGAGGAAAAAGCA         |                              |
| <i>VTC2</i>                                 | GCACGACAGACGTACAAGTTACAA    | This study                   |
|                                             | AATGGGCACGCGTTCAAA          |                              |
| <i>VTC4</i>                                 | CATGGTGTGCAACACTTATGG       | This study                   |
|                                             | GTGGAAGCCAGAAAGGAAAAAG      |                              |
| <i>PPN1</i>                                 | GAAAGATTTAACAATACCGAGTTGGAT | This study                   |
|                                             | TGCGCTATTAAGTCCATCATTAAACA  |                              |
| <i>PPN2</i>                                 | TCGACCACCTAATGCTTTTGG       | This study                   |
|                                             | ATCGCAATTATATTCTCCCCATTTT   |                              |
| <i>PPN3</i>                                 | CCGAATAGTGACCCATCCAAA       | This study                   |
|                                             | CATTCCGATTGTGGAGTTCCA       |                              |

Guether et al. 2009. Plant Physiology 150: 73–83; Kobae et al. 2015. Mycorrhiza 25: 411–417;  
Kojima et al. 2014. Plant & Cell Physiology 55: 928–941; Urbanski et al. 2012. Plant Journal 69: 731–741.
